# Supplementary material for: Oral Valganciclovir Therapy in Infants Aged ≤2 Months with Congenital Cytomegalovirus Disease: A Multicenter, Single-Arm, Open-Label Clinical Trial in Japan
Source: MDPI journal article supplement (doi:10.3390/jcm11133582), 2022-06-21
Supplement: s1 [file s1]

**Supplementary Table S1: Inclusion and exclusion criteria of this clinical trial**

| <b>Inclusion criteria</b> |                                                                                                                                                                                                                                                                                                                        | <b>Exclusion criteria</b> |                                                                                          |
|---------------------------|------------------------------------------------------------------------------------------------------------------------------------------------------------------------------------------------------------------------------------------------------------------------------------------------------------------------|---------------------------|------------------------------------------------------------------------------------------|
| <b>1</b>                  | Confirmation of positive CMV DNA in urine by an in vitro diagnostic test within 21 days after birth                                                                                                                                                                                                                    | <b>1</b>                  | Infants with bacterial infection requiring antibiotics at the time of study enrollment   |
| <b>2</b>                  | Congenital CMV disease with one or more of the following central nervous system disorders:<br>1) Microcephaly<br>2) Hydrocephalus or ventricular enlargement<br>3) Periventricular calcification<br>4) Cortical hypoplasia or white matter injury<br>5) Retinal choroiditis<br>6) Abnormal auditory brainstem response | <b>2</b>                  | Renal insufficiency (serum creatinine level > 1.5 mg/dL) at the time of study enrollment |
| <b>3</b>                  | < 60 days of age at informed consent                                                                                                                                                                                                                                                                                   | <b>3</b>                  | Encephalopathy and hydrocephalus owing to other causes                                   |
| <b>4</b>                  | Gestational age > 32 weeks at birth                                                                                                                                                                                                                                                                                    | <b>4</b>                  | Neutrophil count < 500/mm <sup>3</sup> or platelet count < 25,000/mm <sup>3</sup>        |
| <b>5</b>                  | Body weight at the time of study enrollment > 1,800 g                                                                                                                                                                                                                                                                  | <b>5</b>                  | Infants born to women with human immunodeficiency virus (HIV) or infants with HIV        |
|                           |                                                                                                                                                                                                                                                                                                                        | <b>6</b>                  | Patients deemed inappropriate by a study investigator or sub-investigators               |

This table is cited from reference #22 (Morioka, I.; Kakei, Y.; Omori, T.; Nozu, K.; Fujioka, K.; Yoshikawa, T.; Moriuchi, H.; Ito, Y.; Oka, A. Efficacy and safety of valganciclovir in patients with symptomatic congenital cytomegalovirus disease: Study Protocol Clinical Trial (SPIRIT Compliant). *Medicine* **2020**, *99*, e19765)

**Supplementary Table S2: Summary of the study assessments and procedures**

|                               |   | Screening period | Before treatment initiation | Treatment period           |        |        |        |                         |         | After treatment | At the time of drug withdrawal and discontinuation |                 |                               |                                         |
|-------------------------------|---|------------------|-----------------------------|----------------------------|--------|--------|--------|-------------------------|---------|-----------------|----------------------------------------------------|-----------------|-------------------------------|-----------------------------------------|
|                               |   |                  | Day 0                       | Weeks 1, 2, and 3          | Week 4 | Week 5 | Week 6 | Weeks 8, 13, 17, and 22 | Week 26 | Week 30         | Drug withdrawal                                    | Discontinuation | 4 weeks after discontinuation | 6 months after the first administration |
| Allowable period (days)       |   | -28 to 0         |                             | ± 2                        | ± 2    | ± 2    | ± 2    | ± 7                     | ± 7     |                 |                                                    |                 | ± 7                           | ± 7                                     |
| Obtaining consent             | X |                  |                             |                            |        |        |        |                         |         |                 |                                                    |                 |                               |                                         |
| Obtaining mother's background | X |                  |                             |                            |        |        |        |                         |         |                 |                                                    |                 |                               |                                         |
| Registration                  |   | X                |                             |                            |        |        |        |                         |         |                 |                                                    |                 |                               |                                         |
| Subject's background          |   | X                |                             |                            |        |        |        |                         |         |                 |                                                    |                 |                               |                                         |
| In-hospital /out-hospital     |   | X                | X                           | X                          | X      | X      | X      | X                       | X       | X               | X                                                  | X               | X                             | X                                       |
| Prescription                  |   |                  | X                           | X                          | X      | X      | X      | X                       | X       |                 |                                                    |                 |                               |                                         |
| Viral load in whole blood     |   | X                |                             | X                          | X      | X      | X      | X                       | X       | X               |                                                    | X               | X                             | X                                       |
| Viral load in urine           |   | X                |                             | X                          | X      | X      | X      | X                       | X       | X               |                                                    | X               | X                             | X                                       |
| ABR                           |   | X                |                             |                            |        |        | X      |                         | X       |                 |                                                    | X               |                               | X                                       |
| Fundus examination            |   | X                |                             | when findings are abnormal |        |        |        |                         |         |                 |                                                    |                 |                               |                                         |
| MRI, if necessary CT or US    |   | X                |                             |                            |        |        |        |                         | X       |                 |                                                    |                 |                               |                                         |
| Laboratory test               |   | X                | X                           | X                          | X      | X      | X      | X                       | X       | X               | X                                                  | X               | X                             | X                                       |
| Seizure / paralysis           |   | X                |                             |                            | X      |        | X      | X                       | X       | X               |                                                    |                 | X                             | X                                       |
| Growth evaluation             |   | X                |                             |                            | X      |        | X      | X                       | X       | X               |                                                    |                 | X                             | X                                       |
| Adverse events                |   |                  | X                           | X                          | X      | X      | X      | X                       | X       | X               | X                                                  | X               | X                             |                                         |
| Blood drug concentration      |   |                  |                             |                            |        |        | X      |                         |         |                 |                                                    |                 |                               |                                         |
| Discontinuation information   |   |                  |                             | X                          | X      | X      | X      | X                       | X       | X               | X                                                  | X               |                               |                                         |

X indicates that the activity must be performed.

ABR, auditory brainstem response; CMV, cytomegalovirus; CT, computed tomography; MRI, magnetic resonance imaging; US, ultrasonography

This table is cited from reference #22 (Morioka, I.; Kakei, Y.; Omori, T.; Nozu, K.; Fujioka, K.; Yoshikawa, T.; Moriuchi, H.; Ito, Y.; Oka, A. Efficacy and safety of valganciclovir in patients with symptomatic congenital cytomegalovirus disease: Study Protocol Clinical Trial (SPIRIT Compliant). *Medicine* **2020**, *99*, e19765)

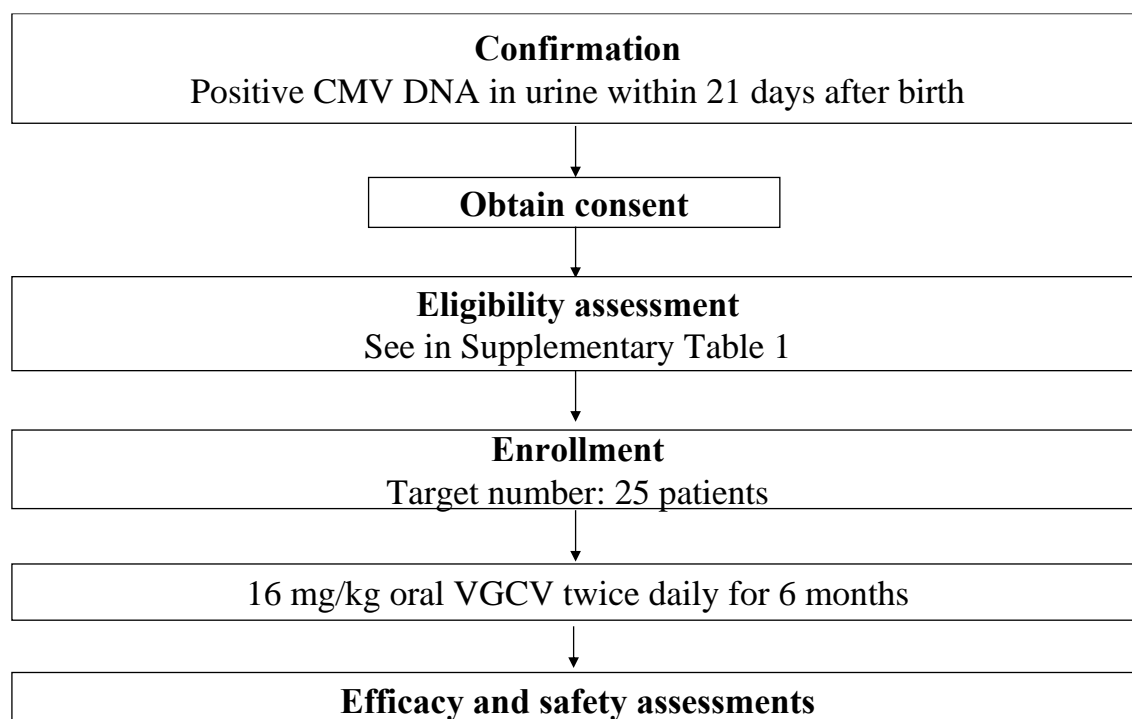

**Supplementary Figure S1: Summary of the study design.**

CMV, cytomegalovirus; VGCV, valganciclovir

This Figure is cited from reference #22 (Morioka, I.; Kakei, Y.; Omori, T.; Nozu, K.; Fujioka, K.; Yoshikawa, T.; Moriuchi, H.; Ito, Y.; Oka, A. Efficacy and safety of valganciclovir in patients with symptomatic congenital cytomegalovirus disease: Study Protocol Clinical Trial (SPIRIT Compliant). *Medicine* **2020**, 99, e19765) and modified.
